# Supplementary material
Source: PubMed Central journal article supplement (PMC5121091)
Supplement: NIHMS814802-supplement-01.pdf [file NIHMS814802-supplement-01.pdf]

**Supplemental Figure 1. Kaplan-Meier analyses of subsets of the OHTS**

**cohort.** Survival probability, which refers to the probability of remaining free of glaucoma, is plotted on the Y-axis. Thus, the probability of developing glaucoma is equal to  $1 -$  the probability of survival. The probability of survival, remaining glaucoma free, was compared with *TMCO1* genotype. Survival probability for participants with no *TMCO1* risk alleles is plotted with a solid line, while survival probability for participants with either 1 or 2 *TMCO1* risk alleles is plotted with a dashed line. **A.** Data plotted from OHTS participants initially randomized for treatment. **B.** Data plotted from OHTS participants initially randomized for observation
