# Supplementary material
Source: PubMed Central journal article supplement (PMC5121091)

Survival Probability

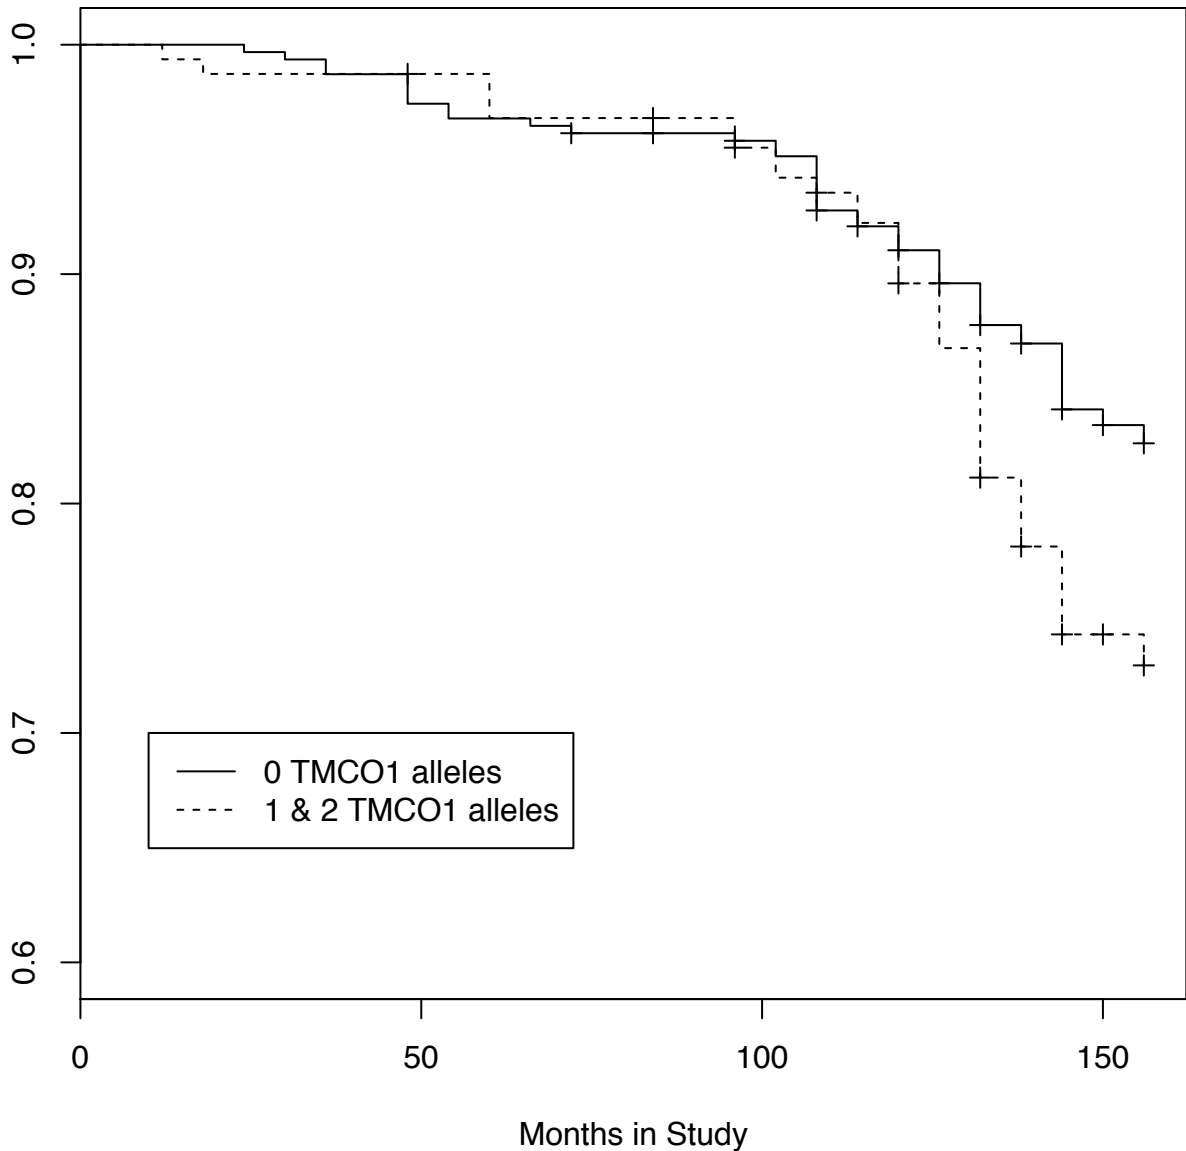

Supplement: NIHMS814802-supplement-1.pdf [file NIHMS814802-supplement-1.pdf]

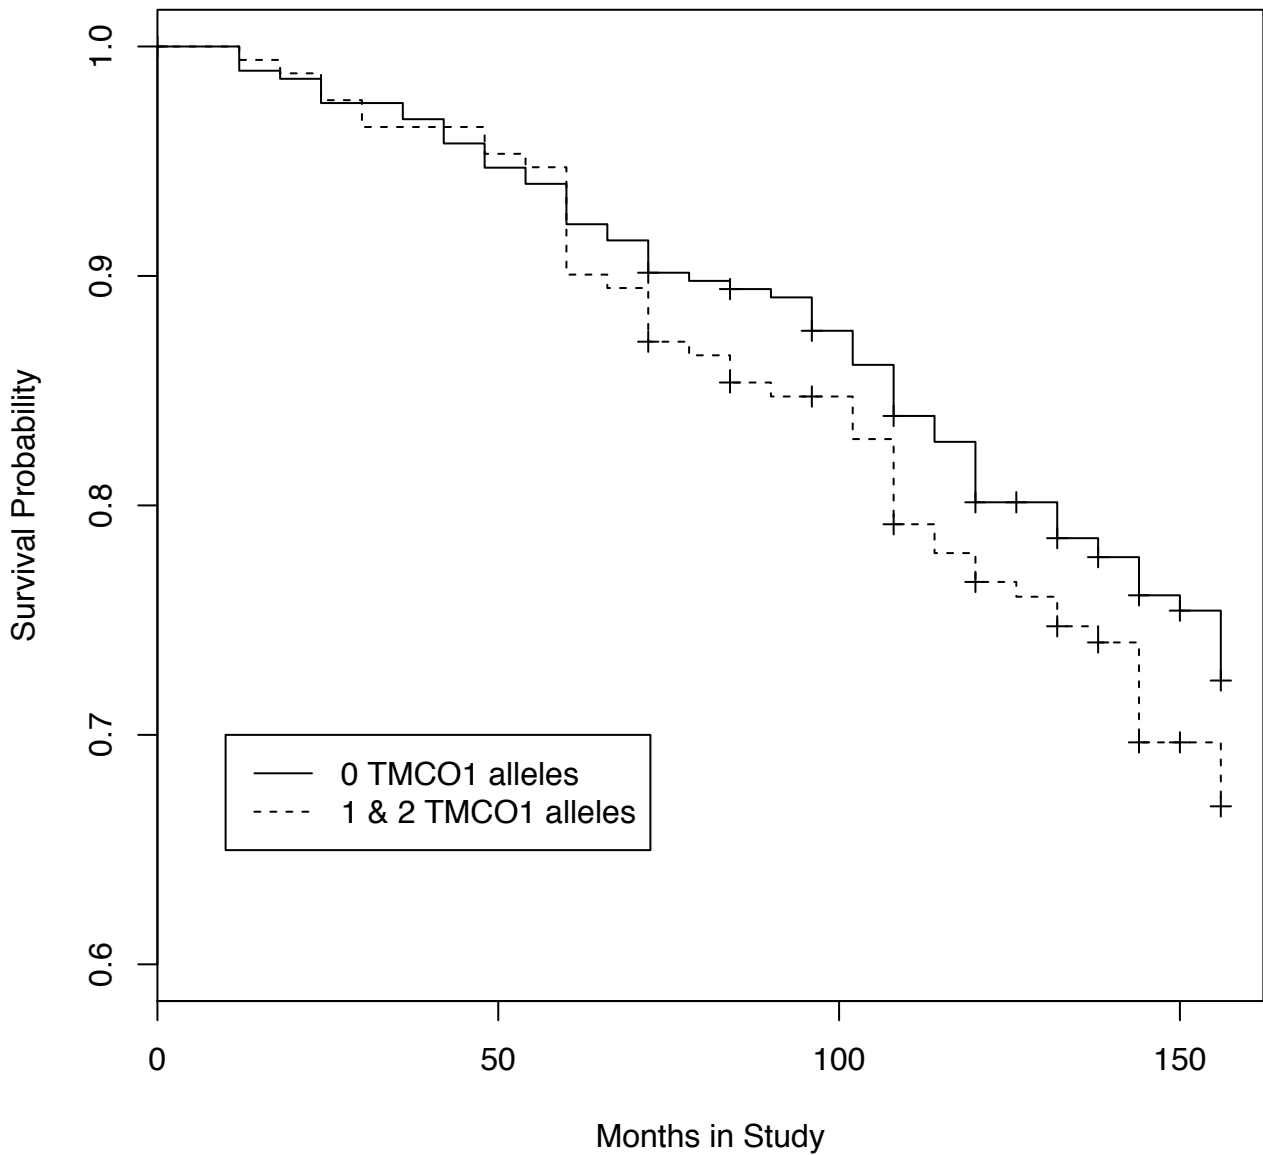

Supplement: NIHMS814802-supplement-2.pdf [file NIHMS814802-supplement-2.pdf]
